# Supplementary material for: The Prognostic Value and Immune Infiltration of USP10 in Pan-Cancer: A Potential Therapeutic Target
Source: PubMed Central journal article supplement (PMC9009419; doi:10.3389/fonc.2022.829705), 2022-03-31
Supplement: DataSheet_1.pdf [file DataSheet_1.pdf]

## Supplementary Materials

### The Prognostic Value and Immune Infiltration of USP10 in Pan-Cancer: A Potential Therapeutic Target

**Supplementary Table 1. Analysis of USP10 Expression in Cancer vs. Normal Tissue by Oncomine Database.**

| Cancer        | Cancer Type                            | P-value  | Fold Change | Rank (%) | Sample | Reference (PMID) |
|---------------|----------------------------------------|----------|-------------|----------|--------|------------------|
| Blader        | Superficial Bladder Cancer             | 1.91E-06 | -1.613      | 12       | 157    | 16432078         |
| Brain and CNS | Brain Glioblastoma                     | 3.83E-06 | -1.589      | 15       | 557    | TCGA             |
| Breast        | Ductal Breast Carcinoma                | 9.86E-05 | 2.42        | 10       | 47     | 16473279         |
|               | Invasive Ductal Breast Carcinoma       | 7.45E-10 | 1.591       | 22       | 593    | TCGA             |
| Cervical      | Cervical Cancer                        | 2.52E-05 | 1.917       | 16       | 84     | 17510386         |
| Colorectal    | Cecum Adenocarcinoma                   | 4.50E-11 | 1.755       | 4        | 237    | TCGA             |
|               | Rectal Adenocarcinoma                  | 1.27E-10 | 1.661       | 11       | 237    | TCGA             |
|               | Colon Adenocarcinoma                   | 6.57E-11 | 1.662       | 12       | 237    | TCGA             |
|               | Colon Adenoma                          | 1.85E-07 | 1.558       | 15       | 64     | 18171984         |
|               | Rectal Adenoma                         | 3.45E-04 | 1.753       | 15       | 64     | 18171984         |
|               | Colon Carcinoma                        | 2.55E-05 | 2.245       | 15       | 40     | 20957034         |
| Colorectal    | Cecum Adenocarcinoma                   | 5.09E-04 | 1.513       | 16       | 105    | 17615082         |
|               | Colorectal Carcinoma                   | 7.44E-06 | 1.574       | 16       | 82     | 20143136         |
| Gastric       | Gastric Intestinal Type Adenocarcinoma | 1.17E-05 | 1.755       | 16       | 69     | 19081245         |
| Head and Neck | Head and Neck Squamous Cell Carcinoma  | 1.10E-08 | 1.862       | 5        | 54     | 14729608         |
|               | Floor of the Mouth Carcinoma           | 4.00E-04 | 2.025       | 8        | 84     | 17510386         |
|               | Tongue Carcinoma                       | 1.18E-04 | 1.595       | 9        | 84     | 17510386         |
| Kidney        | Clear Cell Sarcoma of the Kidney       | 4.98E-06 | -1.586      | 2        | 35     | 16299227         |
| Leukemia      | B-Cell Acute Lymphoblastic Leukemia    | 1.30E-04 | 1.659       | 3        | 28     | 16267031         |
| Lung          | Lung Adenocarcinoma                    | 2.22E-08 | 1.559       | 7        | 156    | 20421987         |
|               | Squamous Cell Lung Carcinoma           | 5.33E-08 | 1.759       | 9        | 156    | 20421987         |
|               | Large Cell Lung Carcinoma              | 1.03E-04 | 1.637       | 12       | 156    | 20421987         |
| Lymphoma      | Anaplastic Large Cell Lymphoma         | 6.13E-05 | 1.848       | 10       | 60     | 17304354         |
|               | Angioimmunoblastic T-Cell Lymphoma     | 4.16E-04 | 1.851       | 15       | 60     | 17304354         |
| Melanoma      | Benign Melanocytic Skin Nevus          | 4.13E-05 | 2.252       | 4        | 70     | 16243793         |
|               | Cutaneous Melanoma                     | 8.57E-06 | 3.033       | 6        | 70     | 16243793         |
| Myeloma       | Smoldering Myeloma                     | 7.49E-04 | 1.584       | 28       | 78     | 17023574         |
| Ovarian       | Ovarian Carcinoma                      | 1.77E-05 | -1.669      | 15       | 195    | 18593951         |
| Prostate      | Prostate Carcinoma                     | 8.32E-04 | 2.155       | 12       | 102    | 12086878         |
| Sarcoma       | Clear Cell Sarcoma of the Kidney       | 4.98E-06 | -1.586      | 2        | 35     | 16299227         |
|               | Myxofibrosarcoma                       | 8.41E-06 | -1.503      | 7        | 158    | 20601955         |

**Supplementary Table 2. Analysis of the Relationship between USP10 Expression and Progression in Different Cancer Patients by Prognoscan Database.**

| Cancer type    | Dataset         | Endpoint | N                  | Hazard ratio (95%)    | Cox P    |
|----------------|-----------------|----------|--------------------|-----------------------|----------|
| Bladder cancer | GSE5287         | OS       | 30                 | 1.94 [0.83 - 4.55]    | 0.126422 |
|                | GSE5287         | OS       | 30                 | 1.85 [0.63 - 5.47]    | 0.265252 |
|                | GSE13507        | OS       | 165                | 0.89 [0.60 - 1.32]    | 0.557421 |
|                | GSE13507        | DSS      | 165                | 1.21 [0.67 - 2.21]    | 0.525113 |
| Blood cancer   | GSE12417-GPL96  | OS       | 163                | 0.92 [0.65 - 1.29]    | 0.627953 |
|                | GSE12417-GPL96  | OS       | 163                | 0.97 [0.58 - 1.60]    | 0.898213 |
|                | GSE12417-GPL570 | OS       | 79                 | 1.24 [0.56 - 2.74]    | 0.594744 |
|                | GSE12417-GPL570 | OS       | 79                 | 1.18 [0.69 - 2.01]    | 0.541867 |
|                | GSE5122         | OS       | 58                 | 1.57 [0.91 - 2.71]    | 0.10791  |
|                | GSE5122         | OS       | 58                 | 1.64 [1.00 - 2.69]    | 0.052198 |
|                | GSE8970         | OS       | 34                 | 0.70 [0.37 - 1.31]    | 0.267191 |
|                | GSE8970         | OS       | 34                 | 1.25 [0.75 - 2.07]    | 0.386637 |
|                | GSE4475         | OS       | 158                | 1.28 [0.70 - 2.33]    | 0.430043 |
|                | GSE4475         | OS       | 158                | 1.61 [0.82 - 3.17]    | 0.165915 |
|                | E-TABM-346      | OS       | 53                 | 0.97 [0.29 - 3.28]    | 0.958764 |
|                | E-TABM-346      | EFS      | 53                 | 2.31 [0.82 - 6.50]    | 0.11104  |
|                | E-TABM-346      | EFS      | 53                 | 0.85 [0.27 - 2.71]    | 0.789643 |
|                | E-TABM-346      | OS       | 53                 | 2.42 [0.79 - 7.45]    | 0.123136 |
|                | GSE16131-GPL96  | OS       | 180                | 0.70 [0.46 - 1.07]    | 0.096713 |
|                | GSE16131-GPL96  | OS       | 180                | 0.62 [0.38 - 1.02]    | 0.061122 |
|                | GSE2658         | DSS      | 559                | 1.66 [0.99 - 2.79]    | 0.056722 |
| GSE2658        | DSS             | 559      | 1.52 [0.89 - 2.57] | 0.121894              |          |
| Brain cancer   | GSE4271-GPL96   | OS       | 77                 | 0.47 [0.26 - 0.85]    | 0.012106 |
|                | GSE4271-GPL96   | OS       | 77                 | 0.58 [0.31 - 1.09]    | 0.092217 |
|                | GSE7696         | OS       | 70                 | 0.64 [0.16 - 2.56]    | 0.523636 |
|                | GSE7696         | OS       | 70                 | 1.02 [0.59 - 1.77]    | 0.930691 |
|                | MGH-glioma      | OS       | 50                 | 0.98 [0.36 - 2.66]    | 0.964566 |
|                | GSE4412-GPL96   | OS       | 74                 | 0.31 [0.16 - 0.59]    | 0.000393 |
|                | GSE4412-GPL96   | OS       | 74                 | 0.47 [0.22 - 1.04]    | 0.063053 |
|                | GSE16581        | OS       | 67                 | 20.90 [1.06 - 412.54] | 0.04577  |
|                | GSE16581        | OS       | 67                 | 7.71 [0.52 - 113.28]  | 0.136261 |
| Breast cancer  | GSE19615        | DMFS     | 115                | 1.90 [0.70 - 5.18]    | 0.209553 |
|                | GSE19615        | DMFS     | 115                | 2.26 [0.65 - 7.85]    | 0.200771 |
|                | GSE3143         | OS       | 158                | 1.43 [0.69 - 2.97]    | 0.338503 |
|                | GSE7849         | DFS      | 76                 | 0.84 [0.29 - 2.46]    | 0.748506 |
|                | GSE12276        | RFS      | 204                | 1.28 [0.95 - 1.74]    | 0.109208 |
|                | GSE12276        | RFS      | 204                | 1.19 [0.88 - 1.62]    | 0.255231 |
|                | GSE6532-GPL570  | RFS      | 87                 | 1.34 [0.63 - 2.86]    | 0.451899 |
|                | GSE6532-GPL570  | DMFS     | 87                 | 0.74 [0.33 - 1.63]    | 0.45023  |

|                |      |     |                     |          |
|----------------|------|-----|---------------------|----------|
| GSE6532-GPL570 | DMFS | 87  | 1.34 [0.63 - 2.86]  | 0.451899 |
| GSE6532-GPL570 | RFS  | 87  | 0.74 [0.33 - 1.63]  | 0.45023  |
| GSE9195        | DMFS | 77  | 1.78 [0.53 - 5.99]  | 0.350257 |
| GSE9195        | DMFS | 77  | 1.81 [0.62 - 5.31]  | 0.280564 |
| GSE9195        | RFS  | 77  | 1.08 [0.38 - 3.07]  | 0.88166  |
| GSE9195        | RFS  | 77  | 1.46 [0.56 - 3.80]  | 0.435409 |
| GSE12093       | DMFS | 136 | 0.54 [0.21 - 1.37]  | 0.19386  |
| GSE12093       | DMFS | 136 | 0.86 [0.37 - 2.00]  | 0.721811 |
| GSE11121       | DMFS | 200 | 0.89 [0.45 - 1.78]  | 0.749067 |
| GSE11121       | DMFS | 200 | 3.51 [1.79 - 6.87]  | 0.000251 |
| GSE1378        | RFS  | 60  | 1.34 [0.83 - 2.19]  | 0.234268 |
| GSE1378        | RFS  | 60  | 1.56 [0.72 - 3.40]  | 0.259295 |
| GSE1379        | RFS  | 60  | 1.11 [0.56 - 2.24]  | 0.760776 |
| GSE1379        | RFS  | 60  | 0.90 [0.41 - 1.95]  | 0.789212 |
| GSE9893        | OS   | 155 | 1.56 [1.18 - 2.07]  | 0.001613 |
| GSE2034        | DMFS | 286 | 0.74 [0.50 - 1.11]  | 0.144775 |
| GSE2034        | DMFS | 286 | 1.36 [0.83 - 2.21]  | 0.223255 |
| GSE1456-GPL96  | OS   | 159 | 3.24 [1.50 - 7.02]  | 0.002777 |
| GSE1456-GPL96  | RFS  | 159 | 2.24 [1.19 - 4.23]  | 0.012635 |
| GSE1456-GPL96  | DSS  | 159 | 2.46 [1.18 - 5.14]  | 0.016407 |
| GSE1456-GPL96  | RFS  | 159 | 3.67 [1.73 - 7.77]  | 0.000677 |
| GSE1456-GPL96  | OS   | 159 | 1.87 [0.99 - 3.55]  | 0.053684 |
| GSE1456-GPL96  | DSS  | 159 | 3.78 [1.54 - 9.29]  | 0.003733 |
| GSE7378        | DFS  | 54  | 5.05 [1.61 - 15.87] | 0.005601 |
| GSE7378        | DFS  | 54  | 1.63 [0.59 - 4.53]  | 0.347077 |
| E-TABM-158     | RFS  | 117 | 0.70 [0.33 - 1.45]  | 0.334027 |
| E-TABM-158     | DSS  | 117 | 0.35 [0.13 - 0.94]  | 0.036632 |
| E-TABM-158     | DMFS | 117 | 0.52 [0.19 - 1.38]  | 0.186466 |
| E-TABM-158     | OS   | 117 | 0.70 [0.33 - 1.45]  | 0.334027 |
| E-TABM-158     | RFS  | 117 | 0.98 [0.55 - 1.74]  | 0.945936 |
| E-TABM-158     | DSS  | 117 | 0.78 [0.40 - 1.55]  | 0.482075 |
| E-TABM-158     | DMFS | 117 | 1.04 [0.51 - 2.12]  | 0.922222 |
| E-TABM-158     | OS   | 117 | 0.98 [0.55 - 1.74]  | 0.945936 |
| GSE3494-GPL96  | DSS  | 236 | 1.52 [0.79 - 2.91]  | 0.206647 |
| GSE3494-GPL96  | DSS  | 236 | 1.56 [0.81 - 3.00]  | 0.183912 |
| GSE4922-GPL96  | DFS  | 249 | 1.67 [1.01 - 2.77]  | 0.045467 |
| GSE4922-GPL96  | DFS  | 249 | 1.85 [1.10 - 3.13]  | 0.020489 |
| GSE2990        | RFS  | 125 | 1.07 [0.54 - 2.13]  | 0.851484 |
| GSE2990        | DMFS | 54  | 0.98 [0.53 - 1.83]  | 0.952689 |
| GSE2990        | RFS  | 62  | 1.02 [0.65 - 1.60]  | 0.932979 |
| GSE2990        | DMFS | 125 | 0.73 [0.25 - 2.17]  | 0.570751 |
| GSE2990        | RFS  | 125 | 0.85 [0.37 - 1.95]  | 0.704236 |
| GSE2990        | RFS  | 62  | 1.03 [0.62 - 1.72]  | 0.901154 |

|                      |                   |      |     |                       |          |
|----------------------|-------------------|------|-----|-----------------------|----------|
|                      | GSE2990           | DMFS | 125 | 0.88 [0.34 - 2.23]    | 0.780581 |
|                      | GSE2990           | DMFS | 54  | 0.99 [0.57 - 1.72]    | 0.970942 |
|                      | GSE7390           | RFS  | 198 | 1.33 [0.97 - 1.81]    | 0.072838 |
|                      | GSE7390           | DMFS | 198 | 1.78 [1.15 - 2.74]    | 0.009123 |
|                      | GSE7390           | OS   | 198 | 1.63 [1.04 - 2.54]    | 0.031925 |
|                      | GSE7390           | DMFS | 198 | 1.50 [1.04 - 2.17]    | 0.030162 |
|                      | GSE7390           | OS   | 198 | 1.50 [1.02 - 2.22]    | 0.041473 |
|                      | GSE7390           | RFS  | 198 | 1.51 [1.06 - 2.16]    | 0.023948 |
| Colorectal cancer    | GSE12945          | OS   | 62  | 2.25 [0.45 - 11.28]   | 0.324629 |
|                      | GSE12945          | DFS  | 51  | 6.73 [0.49 - 93.36]   | 0.155194 |
|                      | GSE12945          | OS   | 62  | 2.79 [0.45 - 17.44]   | 0.27134  |
|                      | GSE12945          | DFS  | 51  | 4.51 [0.48 - 42.53]   | 0.18791  |
|                      | GSE17536          | DSS  | 177 | 0.79 [0.35 - 1.80]    | 0.574519 |
|                      | GSE17536          | OS   | 177 | 0.87 [0.50 - 1.49]    | 0.605519 |
|                      | GSE17536          | DSS  | 177 | 0.73 [0.40 - 1.36]    | 0.323454 |
|                      | GSE17536          | OS   | 177 | 1.26 [0.60 - 2.63]    | 0.536259 |
|                      | GSE17536          | DFS  | 145 | 0.81 [0.38 - 1.73]    | 0.59295  |
|                      | GSE17536          | DFS  | 145 | 0.52 [0.19 - 1.44]    | 0.208157 |
|                      | GSE14333          | DFS  | 226 | 0.46 [0.25 - 0.87]    | 0.016934 |
|                      | GSE14333          | DFS  | 226 | 0.86 [0.49 - 1.52]    | 0.607554 |
|                      | GSE17537          | OS   | 55  | 3.01 [1.29 - 7.04]    | 0.010908 |
|                      | GSE17537          | DFS  | 55  | 4.58 [1.90 - 11.03]   | 0.000694 |
|                      | GSE17537          | OS   | 55  | 2.70 [0.99 - 7.35]    | 0.05228  |
|                      | GSE17537          | DSS  | 49  | 4.09 [1.44 - 11.62]   | 0.0081   |
|                      | GSE17537          | DFS  | 55  | 3.06 [1.03 - 9.10]    | 0.044375 |
|                      | GSE17537          | DSS  | 49  | 2.10 [0.61 - 7.17]    | 0.237012 |
| Esophagus cancer     | GSE11595          | OS   | 34  | 0.54 [0.18 - 1.65]    | 0.280266 |
|                      | GSE11595          | OS   | 34  | 0.93 [0.32 - 2.70]    | 0.889276 |
| Eye cancer           | GSE22138          | DMFS | 63  | 0.79 [0.45 - 1.41]    | 0.426063 |
|                      | GSE22138          | DMFS | 63  | 0.67 [0.39 - 1.16]    | 0.14966  |
| Head and neck cancer | GSE2837           | RFS  | 28  | 0.60 [0.12 - 2.95]    | 0.531901 |
|                      | GSE2837           | RFS  | 28  | 2.84 [0.00 - 2016.13] | 0.755772 |
| Lung cancer          | jacob-00182-CANDF | OS   | 82  | 0.44 [0.19 - 1.02]    | 0.054666 |
|                      | jacob-00182-CANDF | OS   | 82  | 0.44 [0.12 - 1.62]    | 0.214745 |
|                      | HARVARD-LC        | OS   | 84  | 1.38 [0.77 - 2.46]    | 0.277518 |
|                      | jacob-00182-HLM   | OS   | 79  | 0.90 [0.38 - 2.12]    | 0.804682 |
|                      | jacob-00182-HLM   | OS   | 79  | 1.04 [0.39 - 2.76]    | 0.934357 |
|                      | MICHIGAN-LC       | OS   | 86  | 1.32 [0.43 - 4.04]    | 0.626447 |
|                      | jacob-00182-MSK   | OS   | 104 | 1.34 [0.29 - 6.26]    | 0.708144 |
|                      | jacob-00182-MSK   | OS   | 104 | 1.50 [0.57 - 3.93]    | 0.40888  |
|                      | GSE13213          | OS   | 117 | 2.55 [1.24 - 5.25]    | 0.011283 |
|                      | GSE13213          | OS   | 117 | 1.47 [1.05 - 2.06]    | 0.025945 |
|                      | GSE31210          | OS   | 204 | 3.66 [0.90 - 14.89]   | 0.070205 |

|                    |                 |      |     |                     |          |
|--------------------|-----------------|------|-----|---------------------|----------|
|                    | GSE31210        | RFS  | 204 | 5.58 [1.93 - 16.14] | 0.001494 |
|                    | GSE31210        | OS   | 204 | 1.25 [0.30 - 5.12]  | 0.761312 |
|                    | GSE31210        | RFS  | 204 | 1.61 [0.56 - 4.63]  | 0.373167 |
|                    | jacob-00182-UM  | OS   | 178 | 0.82 [0.44 - 1.54]  | 0.53914  |
|                    | jacob-00182-UM  | OS   | 178 | 0.83 [0.33 - 2.06]  | 0.687809 |
|                    | GSE11117        | OS   | 41  | 2.19 [1.03 - 4.67]  | 0.041218 |
|                    | GSE3141         | OS   | 111 | 0.62 [0.34 - 1.16]  | 0.13556  |
|                    | GSE3141         | OS   | 111 | 0.66 [0.36 - 1.24]  | 0.196142 |
|                    | GSE14814        | OS   | 90  | 1.78 [0.69 - 4.64]  | 0.235101 |
|                    | GSE14814        | DSS  | 90  | 1.11 [0.38 - 3.26]  | 0.853846 |
|                    | GSE14814        | OS   | 90  | 1.28 [0.33 - 4.98]  | 0.721632 |
|                    | GSE14814        | DSS  | 90  | 0.82 [0.17 - 3.88]  | 0.806624 |
|                    | GSE4716-GPL3694 | OS   | 50  | 3.08 [0.44 - 21.50] | 0.255716 |
|                    | GSE8894         | RFS  | 138 | 1.08 [0.86 - 1.36]  | 0.490194 |
|                    | GSE8894         | RFS  | 138 | 0.93 [0.64 - 1.35]  | 0.695719 |
|                    | GSE4573         | OS   | 129 | 1.23 [0.58 - 2.63]  | 0.584364 |
|                    | GSE4573         | OS   | 129 | 1.62 [0.87 - 3.03]  | 0.129342 |
|                    | GSE17710        | RFS  | 56  | 1.42 [0.68 - 2.95]  | 0.345448 |
|                    | GSE17710        | RFS  | 56  | 1.34 [0.64 - 2.81]  | 0.436522 |
|                    | GSE17710        | OS   | 56  | 1.56 [0.73 - 3.35]  | 0.249261 |
|                    | GSE17710        | OS   | 56  | 1.48 [0.69 - 3.18]  | 0.314743 |
| Ovarian cancer     | GSE9891         | OS   | 278 | 0.64 [0.42 - 0.99]  | 0.043284 |
|                    | GSE9891         | OS   | 278 | 0.75 [0.56 - 1.00]  | 0.047007 |
|                    | DUKE-OC         | OS   | 133 | 1.14 [0.77 - 1.70]  | 0.510993 |
|                    | DUKE-OC         | OS   | 133 | 0.90 [0.67 - 1.22]  | 0.497325 |
|                    | GSE8841         | OS   | 81  | 0.54 [0.28 - 1.04]  | 0.066864 |
|                    | GSE8841         | OS   | 81  | 1.97 [0.70 - 5.55]  | 0.198476 |
|                    | GSE26712        | DFS  | 185 | 1.02 [0.70 - 1.50]  | 0.900119 |
|                    | GSE26712        | DFS  | 185 | 1.15 [0.83 - 1.58]  | 0.40071  |
|                    | GSE26712        | OS   | 185 | 0.93 [0.61 - 1.41]  | 0.722658 |
|                    | GSE26712        | OS   | 185 | 1.04 [0.73 - 1.49]  | 0.831497 |
|                    | GSE17260        | PFS  | 110 | 0.91 [0.54 - 1.56]  | 0.737392 |
|                    | GSE17260        | PFS  | 110 | 0.71 [0.43 - 1.17]  | 0.181207 |
|                    | GSE17260        | OS   | 110 | 1.36 [0.70 - 2.67]  | 0.36418  |
|                    | GSE17260        | OS   | 110 | 1.00 [0.52 - 1.91]  | 0.990622 |
|                    | GSE14764        | OS   | 80  | 1.75 [0.83 - 3.69]  | 0.138776 |
|                    | GSE14764        | OS   | 80  | 2.50 [1.01 - 6.20]  | 0.04842  |
| Prostate cancer    | GSE16560        | OS   | 281 | 0.90 [0.62 - 1.32]  | 0.60319  |
| Skin cancer        | GSE19234        | OS   | 38  | 6.18 [1.38 - 27.74] | 0.017363 |
|                    | GSE19234        | OS   | 38  | 3.11 [0.93 - 10.38] | 0.064624 |
| Soft tissue cancer | GSE30929        | DRFS | 140 | 1.46 [0.65 - 3.26]  | 0.360254 |
|                    | GSE30929        | DRFS | 140 | 0.91 [0.41 - 2.04]  | 0.824674 |

---
